# Supplementary material for: Race/Ethnicity-Resolved Time Trends in United States ASD Prevalence Estimates from IDEA and ADDM
Source: J Autism Dev Disord. 2019 Aug 21;49(12):4721–30. doi: 10.1007/s10803-019-04188-6 (PMC6841650; doi:10.1007/s10803-019-04188-6)
Supplement: Supplementary file 2 — Supplementary material 2 (XLSX 37 kb) [file 10803_2019_4188_MOESM2_ESM.xlsx]

## Sheet: All Races
State\Report Year	2000	2001	2002	2003	2004	2005	2006	2007	2008	2009	2010	2011	2012	2013	2014	2015	2016	2017
Alabama	84	106	137	160	174	178	195	228	285	335	406	401	461	480	493	570	637	638
Alaska	27	24	23	20	NaN	NaN	23	31	32	78	91	91	82	106	112	128	121	131
Arizona	94	128	152	157	229	287	364	368	476	462	447	473	421	494	459	524	516	652
Arkansas	95	90	84	74	102	106	195	207	209	224	255	290	259	298	300	288	334	330
California	3422	4184	4898	5829	6598	7968	8521	9741	11224	11783	12895	13163	14561	15521	16414	17754	19103	20656
Colorado	53	58	75	99	121	157	249	273	330	330	368	362	399	447	480	664	743	847
Connecticut	152	173	220	316	368	412	453	587	644	673	763	788	799	796	882	971	1061	1197
Delaware	62	64	80	88	92	101	138	135	132	135	141	190	198	171	198	184	252	328
District of Columbia	16	26	27	7	23	39	60	53	50	59	NaN	159	166	159	169	174	156	174
Florida	847	948	1073	1236	1391	1598	1799	1858	2175	2329	2569	2701	3028	3339	3469	3687	3798	3737
Georgia	272	326	347	427	504	550	635	718	800	775	758	811	902	994	1101	1253	1492	1767
Hawaii	88	114	123	152	157	149	159	190	207	226	234	257	275	252	277	323	346	345
Idaho	28	37	48	64	68	86	78	128	132	166	156	130	132	138	155	162	204	214
Illinois	641	660	841	956	1121	1256	1221	1550	1579	1513	1598	1759	1858	1928	1970	2174	2355	2486
Indiana	456	533	632	679	700	777	798	903	997	1016	978	930	928	1025	1027	1132	1086	1169
Iowa	128	26	88	107	117	102	90	96	67	71	83	83	78	73	73	70	74	77
Kansas	87	68	106	137	164	172	169	179	216	231	292	308	344	392	416	420	435	456
Kentucky	168	183	207	228	232	270	299	351	379	387	425	472	518	571	651	767	879	941
Louisiana	121	162	205	284	332	294	318	320	371	392	422	484	482	477	493	530	614	619
Maine	150	160	171	203	270	311	376	390	415	430	405	429	426	465	447	452	509	576
Maryland	371	427	526	548	583	641	606	652	735	756	776	788	861	918	886	889	985	1074
Massachusetts	231	770	887	1080	1142	1370	1579	1839	1958	2075	2182	2290	2516	2850	2945	3260	3557	3779
Michigan	631	698	810	918	1031	1212	1272	1363	1389	1317	1219	1235	1307	1343	1389	1462	1698	1760
Minnesota	345	452	618	762	963	1159	1241	1341	1512	1533	1440	1461	1456	1446	1432	1507	1609	NaN
Mississippi	34	39	53	58	58	69	96	131	140	165	176	226	290	331	343	371	411	437
Missouri	134	128	139	199	255	283	298	350	355	356	403	466	447	463	546	616	641	750
Montana	23	15	17	23	33	44	58	53	54	58	65	50	54	62	83	84	86	95
Nebraska	37	47	64	92	131	154	161	198	188	174	218	195	218	251	263	314	NaN	333
Nevada	89	153	220	273	337	422	497	536	535	612	632	743	856	946	1082	1209	1281	1384
New Hampshire	55	70	77	82	103	112	138	165	209	207	213	240	268	291	317	333	341	324
New Jersey	397	447	464	570	650	734	831	948	985	1046	1099	975	1011	1010	1275	1295	1323	1568
New Mexico	6	20	39	54	73	96	116	139	160	200	138	142	181	210	265	291	307	339
New York	747	899	NaN	NaN	NaN	NaN	1520	1784	1952	2044	2087	2106	2525	2997	3147	3062	3170	4096
North Carolina	261	370	477	613	644	780	903	1022	1164	1216	1324	1500	1632	1839	2026	2174	2317	2532
North Dakota	17	15	19	20	32	39	40	46	41	36	NaN	63	68	75	82	101	120	123
Ohio	326	334	334	344	366	397	410	260	1244	1428	1343	1501	1516	1661	2040	2151	2483	2873
Oklahoma	9	21	15	32	34	57	65	101	127	130	164	200	210	220	263	333	360	405
Oregon	429	506	588	630	686	782	848	950	970	884	981	1026	1018	1042	1027	1090	1123	1185
Pennsylvania	613	852	1053	1373	1582	2063	2458	2599	2915	3008	3110	3033	3060	3179	3519	3848	4123	4607
Rhode Island	48	72	74	87	104	121	130	180	204	208	181	165	188	175	183	176	198	216
South Carolina	121	158	220	220	226	281	392	357	442	525	584	642	811	876	913	1026	1035	1143
South Dakota	35	43	53	63	66	80	89	90	88	106	118	121	92	108	120	132	137	173
Tennessee	153	190	247	299	356	416	481	542	581	626	648	742	831	851	967	1107	1303	1463
Texas	1108	1174	1270	1586	1824	2123	2443	2832	3367	3573	3419	3447	6678	7064	7464	8030	9120	10408
Utah	58	107	123	149	205	247	247	262	319	364	338	280	316	293	291	303	302	371
Vermont	7	16	30	35	49	48	58	NaN	NaN	61	70	71	67	59	41	58	65	74
Virginia	228	266	363	418	470	548	581	742	879	856	936	1047	1205	1338	1388	1547	1692	1889
Washington	64	132	192	288	333	409	514	610	714	773	803	878	909	979	1066	1182	1239	1425
West Virginia	14	15	27	27	33	33	38	48	61	53	68	68	89	75	82	105	103	137
Wisconsin	306	334	340	410	485	562	593	642	687	717	713	731	791	877	945	1068	NaN	NaN
Wyoming	21	14	18	20	29	37	35	43	50	59	NaN	82	NaN	NaN	83	105	105	99

## Sheet: Whites
State\Report Year	2000	2001	2002	2003	2004	2005	2006	2007	2008	2009	2010	2011	2012	2013	2014	2015	2016	2017
Alabama	51	61	79	105	113	117	136	163	209	237	265	256	299	293	288	342	383	395
Alaska	19	19	16	13	NaN	NaN	19	21	20	45	51	54	47	54	49	62	52	65
Arizona	61	84	93	101	151	200	190	206	277	239	227	222	195	236	219	218	215	259
Arkansas	76	70	72	61	76	81	148	157	164	178	180	204	191	217	217	208	224	211
California	1646	1961	2256	2581	2843	3350	3569	4011	4484	4165	4140	4007	4061	4162	4274	4386	4320	4347
Colorado	39	40	60	87	93	115	180	203	243	230	221	218	230	273	269	372	415	449
Connecticut	121	140	173	251	285	310	326	403	439	468	491	460	437	444	484	496	533	556
Delaware	39	41	54	65	67	71	88	80	82	78	67	89	103	80	94	93	139	165
District of Columbia	1	4	2	NaN	NaN	NaN	NaN	NaN	8	NaN	NaN	NaN	20	15	19	20	16	18
Florida	454	501	568	650	700	786	907	911	1068	1059	1054	1129	1188	1244	1243	1312	1317	1244
Georgia	163	189	210	241	272	315	358	392	398	365	341	355	345	389	422	468	574	652
Hawaii	17	29	32	43	44	42	41	53	67	68	77	89	86	66	57	64	51	50
Idaho	23	32	42	51	58	75	67	112	113	135	123	99	106	106	119	122	152	168
Illinois	424	436	536	642	722	798	872	957	947	860	858	885	919	978	1049	1111	1122	1165
Indiana	400	454	533	563	590	659	680	756	822	813	712	652	651	700	682	731	703	727
Iowa	116	24	78	97	101	89	79	83	57	61	69	70	64	61	59	57	59	61
Kansas	71	55	80	105	126	130	137	139	168	158	225	224	248	264	270	271	285	291
Kentucky	140	159	179	205	208	243	258	306	323	324	336	366	398	451	511	615	703	730
Louisiana	50	87	115	162	186	179	194	179	223	228	231	258	263	259	277	282	330	315
Maine	149	158	168	199	260	295	361	369	391	412	387	395	396	430	399	408	436	500
Maryland	188	231	261	288	318	335	315	345	364	353	295	298	319	321	326	314	345	378
Massachusetts	178	649	726	896	924	1114	1238	1435	1427	1482	1516	1483	1560	1690	1714	1825	1909	1944
Michigan	501	567	661	735	818	941	990	1035	1030	956	835	801	855	906	935	944	1080	1102
Minnesota	290	374	505	607	782	925	974	1028	1137	1092	956	954	949	936	910	917	979	NaN
Mississippi	19	20	29	32	35	52	52	77	87	94	97	122	174	189	177	195	206	228
Missouri	103	108	111	161	197	201	234	284	282	289	304	350	337	339	374	421	444	536
Montana	22	15	15	20	27	41	50	48	50	50	58	44	44	53	63	64	61	73
Nebraska	30	44	52	74	108	118	134	154	149	134	157	133	140	169	165	185	NaN	188
Nevada	59	97	141	161	194	238	283	327	344	345	305	338	386	409	399	463	452	454
New Hampshire	52	66	73	77	95	103	126	151	189	181	189	212	234	248	273	279	279	260
New Jersey	263	321	312	400	435	474	519	602	590	587	592	509	463	463	542	522	531	552
New Mexico	1	13	25	33	39	48	63	84	67	68	52	55	60	69	90	100	108	115
New York	460	545	NaN	NaN	NaN	NaN	903	1056	1176	1151	1121	1099	1087	1162	1267	1253	1310	1499
North Carolina	160	239	298	373	404	523	625	655	739	735	754	782	791	874	978	1026	1143	1200
North Dakota	15	14	16	19	26	35	32	37	33	29	31	51	53	51	60	72	86	87
Ohio	275	280	281	291	308	331	340	200	966	1110	1038	1108	1091	1176	1434	1546	1737	1972
Oklahoma	6	12	10	20	15	32	37	62	78	81	91	126	116	121	144	173	172	195
Oregon	385	433	482	522	551	635	655	752	760	661	722	736	726	716	677	751	736	738
Pennsylvania	465	721	893	1126	1288	1624	1927	1969	2093	2072	2100	1964	1901	1933	2089	2278	2339	2566
Rhode Island	44	64	65	80	86	99	97	134	155	159	131	122	135	117	121	128	144	150
South Carolina	58	73	121	119	127	150	232	202	272	319	302	317	397	446	447	522	526	584
South Dakota	34	42	48	48	57	71	76	72	63	85	87	95	68	84	89	91	88	111
Tennessee	112	148	192	223	271	309	364	411	430	458	465	503	536	542	628	708	806	846
Texas	598	629	655	805	842	969	1046	1189	1357	1348	1151	1106	2094	2140	2238	2371	2552	2744
Utah	54	105	122	139	188	220	227	244	284	313	301	249	272	246	237	244	228	281
Vermont	7	15	26	33	46	43	51	NaN	NaN	56	NaN	68	66	54	33	51	60	68
Virginia	156	188	241	276	305	352	368	461	536	524	520	577	647	679	688	774	846	885
Washington	59	105	159	225	261	312	389	469	541	569	479	518	522	544	598	633	642	746
West Virginia	14	14	27	23	30	30	NaN	44	58	51	62	61	75	63	71	93	90	123
Wisconsin	252	281	286	360	418	483	490	529	541	565	529	539	550	585	641	704	NaN	NaN
Wyoming	20	12	16	17	24	34	33	39	46	49	NaN	68	NaN	NaN	66	79	79	75

## Sheet: Blacks
State\Report Year	2000	2001	2002	2003	2004	2005	2006	2007	2008	2009	2010	2011	2012	2013	2014	2015	2016	2017
Alabama	30	43	55	52	56	55	52	52	66	86	108	113	124	148	160	175	183	173
Alaska	NaN	NaN	1	1	NaN	NaN	NaN	NaN	NaN	NaN	8	NaN	3	1	4	5	8	8
Arizona	4	5	10	7	11	15	27	18	30	43	25	29	24	31	34	29	25	31
Arkansas	17	19	10	9	20	15	29	36	28	29	37	47	41	38	36	30	43	53
California	266	319	380	420	514	640	652	667	769	720	856	864	1016	1101	1119	1127	1154	1227
Colorado	3	3	2	3	6	9	14	11	13	22	17	17	16	20	25	29	41	56
Connecticut	17	16	29	35	44	49	49	74	77	76	84	93	99	102	107	125	121	151
Delaware	17	19	16	16	16	17	34	33	28	36	37	59	60	61	61	50	63	82
District of Columbia	15	20	23	5	18	32	49	41	37	43	69	116	107	109	113	126	113	126
Florida	150	156	184	218	248	278	288	320	384	419	453	499	554	704	768	737	786	842
Georgia	85	108	110	149	186	181	205	223	263	269	268	291	362	405	434	491	560	682
Hawaii	2	5	4	6	5	NaN	7	9	NaN	5	9	NaN	19	12	12	NaN	NaN	8
Idaho	2	2	1	1	NaN	NaN	NaN	NaN	NaN	NaN	NaN	NaN	1	NaN	1	1	1	1
Illinois	117	121	163	155	193	194	146	250	263	258	239	281	315	312	287	320	344	353
Indiana	45	60	70	85	70	70	70	83	112	116	114	132	113	124	110	136	131	140
Iowa	7	1	6	4	NaN	NaN	NaN	NaN	NaN	NaN	NaN	NaN	4	4	5	5	5	5
Kansas	10	6	14	15	20	25	15	21	20	22	19	18	23	31	32	34	28	35
Kentucky	19	17	19	14	19	21	29	34	42	36	44	44	62	61	73	64	72	84
Louisiana	65	66	83	105	129	102	110	123	128	140	152	185	172	157	161	168	195	222
Maine	1	NaN	1	NaN	5	NaN	6	6	14	9	5	NaN	9	11	15	14	29	28
Maryland	152	154	202	191	195	233	228	222	259	275	302	313	331	359	345	337	346	365
Massachusetts	24	33	55	67	83	97	127	128	140	155	161	187	226	265	274	316	335	382
Michigan	83	92	101	121	153	190	196	226	257	257	254	285	282	267	274	289	324	321
Minnesota	20	38	52	83	94	111	142	148	175	201	203	206	221	197	190	210	219	NaN
Mississippi	13	17	22	24	19	17	42	49	47	58	71	95	98	126	133	143	167	167
Missouri	28	18	24	32	48	67	54	55	59	46	60	66	59	69	90	90	90	104
Montana	NaN	NaN	NaN	NaN	NaN	NaN	NaN	NaN	NaN	NaN	NaN	NaN	NaN	1	NaN	NaN	NaN	NaN
Nebraska	2	2	6	9	8	10	13	18	15	16	26	25	21	23	28	39	NaN	27
Nevada	6	11	22	33	37	NaN	NaN	50	44	69	66	74	79	99	120	129	134	137
New Hampshire	1	1	2	1	NaN	NaN	NaN	NaN	7	11	8	8	6	7	8	13	4	4
New Jersey	66	58	44	56	81	98	122	123	114	144	141	136	183	182	206	218	187	265
New Mexico	NaN	NaN	2	1	NaN	NaN	NaN	NaN	6	8	NaN	NaN	3	8	7	6	5	7
New York	127	156	NaN	NaN	NaN	NaN	278	295	349	385	380	350	525	632	635	555	569	822
North Carolina	89	108	148	195	193	210	197	224	249	275	315	411	503	580	601	645	656	695
North Dakota	NaN	NaN	1	1	NaN	NaN	NaN	NaN	NaN	NaN	NaN	NaN	6	6	5	7	7	7
Ohio	44	44	43	42	44	51	53	43	143	161	166	214	220	246	306	316	390	420
Oklahoma	NaN	4	3	4	NaN	7	12	13	17	19	21	14	22	18	20	21	35	35
Oregon	5	6	17	24	38	34	28	24	22	28	30	34	34	37	29	30	34	37
Pennsylvania	113	85	97	154	185	259	319	373	487	552	601	568	486	456	535	636	704	746
Rhode Island	1	4	5	3	NaN	5	6	12	15	16	13	9	10	11	11	7	10	13
South Carolina	61	78	95	91	89	114	128	122	142	156	212	242	310	311	330	352	340	344
South Dakota	NaN	NaN	NaN	4	NaN	NaN	NaN	6	5	NaN	NaN	5	6	5	5	4	9	14
Tennessee	34	38	48	64	68	79	83	91	102	108	103	145	191	203	218	273	332	376
Texas	172	168	174	207	249	286	361	369	447	508	449	484	943	1029	1044	1108	1209	1434
Utah	2	1	NaN	1	NaN	NaN	NaN	NaN	NaN	NaN	NaN	NaN	4	2	3	4	3	2
Vermont	NaN	NaN	1	NaN	NaN	NaN	NaN	NaN	NaN	NaN	NaN	NaN	NaN	2	3	3	3	NaN
Virginia	51	48	71	83	95	102	105	147	195	181	199	232	255	294	304	305	303	368
Washington	3	7	10	17	21	22	26	23	32	41	65	58	73	68	72	71	67	70
West Virginia	NaN	1	NaN	2	NaN	NaN	NaN	NaN	NaN	NaN	NaN	NaN	5	5	3	4	7	4
Wisconsin	30	31	31	22	31	44	44	54	62	75	70	71	66	94	99	124	NaN	NaN
Wyoming	1	1	NaN	NaN	NaN	NaN	NaN	NaN	NaN	NaN	NaN	NaN	NaN	NaN	2	2	2	2

## Sheet: Hispanics
State\Report Year	2000	2001	2002	2003	2004	2005	2006	2007	2008	2009	2010	2011	2012	2013	2014	2015	2016	2017
Alabama	1	1	NaN	1	NaN	NaN	NaN	7	5	NaN	19	15	19	19	24	27	38	41
Alaska	NaN	NaN	NaN	NaN	NaN	NaN	NaN	NaN	NaN	7	11	8	6	6	13	15	15	14
Arizona	23	32	42	37	60	55	121	105	134	140	163	165	150	176	155	218	220	291
Arkansas	1	1	NaN	3	NaN	6	13	11	11	NaN	28	24	19	21	31	35	41	41
California	992	1250	1490	1903	2152	2653	2898	3416	4128	4687	5309	5628	6590	7108	7575	8378	9239	10159
Colorado	7	8	9	7	19	28	44	50	61	70	108	102	129	114	142	191	209	252
Connecticut	7	9	10	21	22	36	48	72	89	101	136	163	178	172	213	242	292	349
Delaware	NaN	NaN	2	3	NaN	6	6	9	NaN	14	21	23	15	11	19	21	27	49
District of Columbia	NaN	2	2	1	NaN	NaN	NaN	NaN	5	NaN	9	20	31	25	29	20	23	22
Florida	216	263	296	326	395	467	532	564	646	770	880	918	1089	1177	1211	1367	1415	1345
Georgia	12	10	13	24	28	26	47	48	64	77	80	90	115	109	136	161	181	241
Hawaii	3	4	4	3	5	NaN	11	12	11	12	14	24	42	40	44	64	70	68
Idaho	3	3	5	6	7	5	8	10	15	23	23	17	13	25	8	31	38	36
Illinois	64	66	95	108	142	176	126	243	260	274	309	405	433	427	417	477	597	621
Indiana	7	17	20	21	27	29	32	52	51	73	88	90	96	105	123	135	148	164
Iowa	4	1	3	4	6	5	5	7	5	5	6	6	8	6	7	5	6	5
Kansas	2	3	4	12	12	12	10	14	21	38	36	41	47	63	76	83	86	82
Kentucky	2	2	2	1	NaN	NaN	6	NaN	8	14	22	34	34	31	36	42	51	72
Louisiana	2	6	3	8	8	8	9	11	11	15	22	23	24	30	31	44	53	52
Maine	NaN	NaN	NaN	3	NaN	7	NaN	10	7	NaN	NaN	NaN	5	3	6	11	8	5
Maryland	12	17	24	27	NaN	NaN	NaN	NaN	50	59	93	92	105	111	93	105	141	158
Massachusetts	26	51	59	60	70	96	135	182	222	240	287	385	470	615	641	738	889	955
Michigan	14	12	25	24	25	37	38	44	48	55	57	63	73	83	103	112	141	152
Minnesota	10	20	25	34	34	48	52	67	81	106	116	136	120	126	130	146	163	NaN
Mississippi	1	2	1	1	NaN	NaN	NaN	NaN	NaN	9	6	NaN	7	7	14	10	14	15
Missouri	1	NaN	3	4	NaN	10	NaN	NaN	7	12	16	23	15	20	37	51	48	45
Montana	NaN	NaN	NaN	NaN	NaN	NaN	NaN	NaN	NaN	NaN	NaN	NaN	2	4	7	5	10	8
Nebraska	3	NaN	4	5	7	14	10	18	18	17	19	24	37	40	42	57	NaN	84
Nevada	14	25	39	55	74	100	126	115	117	158	183	206	269	290	375	419	483	543
New Hampshire	1	2	2	4	NaN	NaN	NaN	NaN	7	9	9	8	15	22	23	23	28	34
New Jersey	40	36	56	66	85	98	111	134	NaN	186	231	214	239	239	339	367	396	474
New Mexico	4	6	11	18	32	44	43	42	75	104	70	69	88	102	135	150	163	184
New York	137	171	NaN	NaN	NaN	NaN	268	328	315	399	441	477	662	901	934	870	856	1227
North Carolina	6	15	17	23	30	29	47	50	71	101	148	163	179	223	269	285	307	359
North Dakota	1	1	1	NaN	NaN	NaN	NaN	NaN	NaN	NaN	NaN	6	3	4	4	9	10	11
Ohio	5	7	7	8	9	10	11	NaN	40	45	40	79	81	103	131	112	126	158
Oklahoma	1	1	NaN	3	5	7	NaN	NaN	NaN	15	21	29	36	38	54	66	72	84
Oregon	25	38	51	50	60	67	100	106	121	132	146	160	177	203	214	200	200	239
Pennsylvania	21	27	35	53	63	103	130	158	212	260	278	302	353	413	465	487	573	677
Rhode Island	2	3	3	4	11	15	18	22	21	24	23	19	31	32	31	21	24	30
South Carolina	1	3	2	5	NaN	10	19	20	NaN	36	44	47	53	72	81	94	105	106
South Dakota	NaN	NaN	2	2	NaN	NaN	5	NaN	NaN	NaN	5	5	2	6	8	9	7	12
Tennessee	4	3	5	7	9	18	24	25	34	44	49	58	62	57	69	76	92	136
Texas	281	309	364	490	627	736	887	1086	1355	1472	1551	1569	3118	3281	3492	3756	4397	5067
Utah	2	1	1	8	12	22	14	11	27	38	23	15	28	30	33	41	56	59
Vermont	NaN	NaN	NaN	NaN	NaN	NaN	NaN	NaN	NaN	NaN	NaN	NaN	NaN	1	3	3	NaN	1
Virginia	7	9	26	30	NaN	NaN	43	53	66	73	92	120	154	173	166	194	214	257
Washington	2	2	6	15	NaN	16	28	39	61	80	124	132	131	173	174	219	240	283
West Virginia	NaN	NaN	NaN	1	NaN	NaN	NaN	NaN	NaN	NaN	NaN	NaN	3	3	6	3	1	4
Wisconsin	9	12	11	12	15	14	26	30	41	42	69	72	110	114	119	143	NaN	NaN
Wyoming	NaN	1	1	3	NaN	NaN	NaN	NaN	NaN	7	NaN	9	NaN	NaN	8	14	14	9
