# Supplementary material for: Race/Ethnicity-Resolved Time Trends in United States ASD Prevalence Estimates from IDEA and ADDM
Source: J Autism Dev Disord. 2019 Aug 21;49(12):4721–30. doi: 10.1007/s10803-019-04188-6 (PMC6841650; doi:10.1007/s10803-019-04188-6)
Supplement: Supplementary file 3 — Supplementary material 3 (XLSX 40 kb) [file 10803_2019_4188_MOESM3_ESM.xlsx]

## Sheet: All Races
State\Report Year	2000	2001	2002	2003	2004	2005	2006	2007	2008	2009	2010	2011	2012	2013	2014	2015	2016
Alabama	55112	54148	55499	56541	56964	58692	58209	55972	56205	57019	57665	56277	59428	59757	57939	55613	55474
Alaska	9677	10095	10069	9475	9870	9934	9795	9625	9744	9804	10120	10453	10569	10632	10559	10409	10274
Arizona	68347	72119	71357	76365	80614	83529	85388	86742	87229	84191	82860	84109	86265	86258	83241	79396	79760
Arkansas	33941	34981	35283	36391	36967	38070	38058	38192	37997	38115	37701	37305	40463	39900	38503	37509	36917
California	459771	457165	456940	456941	455155	458440	454605	454743	461063	471058	468036	487817	489274	506831	511985	530531	535379
Colorado	51039	53079	53872	55913	56968	59398	60922	61576	63985	64190	65182	66361	66951	67225	66068	64631	64011
Connecticut	41570	41906	41224	42310	41886	41206	40834	39889	40684	39866	39670	38773	39410	38274	37654	36641	36621
Delaware	7691	7615	7761	7904	8279	8511	8604	8817	9458	9537	9810	10116	10128	10488	10205	10040	9894
District of Columbia	5357	5203	5475	5659	5387	5545	5323	5306	5122	5190	5939	6347	6980	7174	7273	7319	7574
Florida	175812	177225	183270	191986	197163	203325	202063	197467	193428	196057	197097	203302	210489	209318	204552	199514	201060
Georgia	110960	111173	114772	118849	122495	128397	130453	129791	129336	131325	132008	133046	136837	136658	133616	128788	127056
Hawaii	14071	13822	13377	13779	13576	14236	13953	15042	15475	15970	16028	16827	17497	17561	11661	14860	14652
Idaho	17093	17869	17965	18590	19603	19987	20922	21295	21516	21605	21144	21850	22409	23396	21509	20988	21085
Illinois	147619	148348	148274	146803	145797	147726	147440	145755	146969	148097	146225	145236	147315	145117	139729	135924	134735
Indiana	70727	72344	71570	72315	73142	75519	79145	75445	76308	78224	76765	78086	80681	80611	78861	77044	76874
Iowa	33977	34249	34090	35295	36713	37435	37592	37819	38522	38956	39306	39924	41381	41240	39923	39218	38178
Kansas	30392	30104	29910	33677	34203	34723	35392	35471	36267	36461	37023	37461	38379	38534	37524	36975	35750
Kentucky	48064	45781	46666	48182	49027	50266	50639	49986	50643	51276	51091	52269	53875	52267	51876	49463	48888
Louisiana	55293	53323	55020	56629	57386	52937	53804	53062	52660	53763	54276	56035	58691	57377	56119	53716	53103
Maine	13769	13709	13731	14021	13687	13766	14001	13710	13475	13704	13819	13098	13727	13451	13274	12835	12650
Maryland	56073	56384	56577	55485	54838	56858	56133	59455	60530	61428	62704	64727	66896	67548	66200	64930	64472
Massachusetts	70647	68565	69324	69704	68357	68242	68585	67900	68540	68369	67496	67956	69669	69853	67670	66142	66249
Michigan	126661	125197	130891	130527	131141	131886	129676	125592	124451	126313	112835	107391	107986	106166	105582	113090	115715
Minnesota	58963	58357	58757	59330	58657	59666	60712	60140	61982	63111	62961	64123	65745	65618	64454	63591	63295
Mississippi	37373	36931	36845	38340	39547	40346	39617	38662	38511	39148	38923	41048	43208	41948	40543	37573	36652
Missouri	63634	64104	64750	66509	64328	68221	67873	67314	67690	69016	69376	69716	71778	70845	68753	67126	66052
Montana	10129	10069	9899	10147	10206	10300	10409	10601	10802	10960	11115	11697	11709	12038	11682	11502	11678
Nebraska	20210	20234	20440	20719	21205	21888	22080	22588	22790	23577	23411	23795	22095	24025	23951	23374	22283
Nevada	26445	26877	27287	28596	29877	29978	31746	31682	32188	32038	32454	33402	35008	35073	33942	34495	34626
New Hampshire	9188	9599	9757	9989	10116	10360	10375	10489	10968	11969	11970	11904	11892	11615	11580	11192	11430
New Jersey	89912	89533	91189	93201	93157	93151	93043	91115	93504	95251	92413	90857	94830	92017	92560	91870	91197
New Mexico	22065	22137	22638	23636	24624	25140	25668	25796	25680	26266	26688	26906	27662	27368	26660	24696	24301
New York	194673	190402	189198	188638	188633	189924	186373	184672	187194	190741	194607	196739	202670	201930	200507	198024	194163
North Carolina	101049	102772	104843	109336	111753	116829	118443	120998	117282	104954	115782	117445	121389	122209	119730	116324	114414
North Dakota	7146	7059	7013	6891	6643	6579	6650	6730	7217	7472	7449	8071	8578	8822	9031	8929	8843
Ohio	128640	121772	130996	134036	134215	135854	133990	130889	130405	131114	129964	131309	131874	131003	129013	124097	122516
Oklahoma	42979	43214	45050	46542	47152	48667	49362	49306	50497	51037	52114	53046	55115	54923	55134	53462	52194
Oregon	37739	38085	38204	38785	38997	39759	39572	39820	40556	40563	40656	41346	42642	42728	41645	41625	41796
Pennsylvania	119318	118183	116332	118647	124435	127065	126821	122769	126197	128947	128120	128270	129624	129360	127398	120874	122763
Rhode Island	10521	10704	10689	10702	8824	9580	10231	9840	9905	10254	10057	9900	10786	10490	9885	9897	10059
South Carolina	47277	46055	49318	50985	52327	52805	53154	52314	52468	53615	54624	56065	58641	58226	58282	55389	55424
South Dakota	8989	9075	11121	9201	9257	9470	9614	9688	10315	10560	11049	11375	11901	11898	11768	11552	11643
Tennessee	70351	69429	70151	73202	74740	76449	77494	75289	76156	76745	76642	79425	81186	78601	74960	74240	74667
Texas	294217	302859	315290	323502	333934	350124	352980	356706	362318	369433	374195	379446	390636	391731	390552	376824	372019
Utah	36039	36521	37872	39348	41088	42307	43518	47591	47046	47684	48043	48953	50378	50386	48841	48293	48264
Vermont	6511	6289	6342	6078	6249	6069	6198	6161	6192	6216	6259	6042	6273	6215	5768	5863	5822
Virginia	82585	82489	83270	86374	87223	89427	89644	89656	89931	92281	92899	95574	96935	96058	93758	90942	90800
Washington	68531	68280	69467	70663	71219	72644	72608	72165	73831	74547	75933	78014	80789	81559	81212	79692	81102
West Virginia	20937	20247	20437	20946	20942	21428	24308	21300	20919	21454	21256	21172	21785	21541	20860	20163	19869
Wisconsin	56507	57469	57670	59372	58724	60382	60408	59590	60384	61094	60721	60824	62422	61522	60424	58078	57332
Wyoming	5988	6002	6153	6224	6264	6381	6575	6891	7215	7406	7611	7860	8131	8141	7997	7841	7584

## Sheet: Whites
State\Report Year	2000	2001	2002	2003	2004	2005	2006	2007	2008	2009	2010	2011	2012	2013	2014	2015	2016
Alabama	33352	33069	33622	33943	34468	34899	34197	32964	33085	33300	33442	32620	32731	32416	31002	29991	30124
Alaska	5557	5469	5456	5372	5568	5532	5513	4918	5132	5511	5194	5217	5160	5218	4972	5034	4874
Arizona	33530	33804	32238	34019	35216	35995	35455	36081	37118	35455	33758	33695	33647	32668	31647	30084	30317
Arkansas	23781	24233	24120	24699	24989	25395	25104	24899	24812	24361	23811	23426	24966	24228	23330	22587	22214
California	144900	138510	134918	130698	126597	122106	122404	116291	117872	117599	113871	116819	115402	117444	118838	121941	121951
Colorado	32442	32828	32787	33058	33359	34226	35579	36112	37685	38545	35248	36233	36103	35824	35199	34785	34568
Connecticut	28350	28249	27318	27244	26892	26250	25472	24519	24706	23854	22734	21519	21142	20365	19461	18808	18608
Delaware	4486	4332	4302	4197	4389	4323	4286	4285	4610	4616	4490	4823	4622	4564	4389	4408	4216
District of Columbia	288	324	331	368	374	458	478	546	534	622	705	736	851	857	951	1016	1110
Florida	90959	90849	91493	94399	96298	96658	88546	85100	82780	83138	81737	82608	83685	82218	79701	77020	75941
Georgia	58925	58522	59401	60658	58291	58546	57951	57074	57335	57605	56729	56482	56079	54878	52756	50663	49456
Hawaii	3049	2985	2878	2824	2760	2846	2913	3132	3339	3559	2581	2378	2503	2512	1739	1943	1916
Idaho	-999	-999	14787	15045	15953	16164	16671	17045	17216	17075	16316	16766	16991	17698	16361	15753	15702
Illinois	84034	81782	81426	80438	78676	78243	77072	75188	74580	74822	72016	70650	70983	69348	66592	65363	65047
Indiana	58412	59877	58339	58127	58441	59795	58224	54664	55216	55675	53842	54416	55261	54711	53375	51867	51761
Iowa	29923	29941	29419	30349	31399	31536	31667	31529	31971	31000	31215	31555	32103	31673	30548	29900	28867
Kansas	22688	22302	21754	23837	23966	24276	24923	24842	24781	24053	24268	24405	25047	24624	24094	23866	22945
Kentucky	39434	39784	40532	41704	42155	43055	41665	41040	40655	41448	40721	41028	41706	39958	39739	37779	37073
Louisiana	26503	25978	26150	27194	27508	26586	26186	25385	25597	25559	25981	25468	26471	25575	24998	23609	23220
Maine	13216	13072	13065	13323	13018	13005	13150	12806	12570	12658	12612	12279	12333	12031	11867	11447	11220
Maryland	29567	28867	28215	27174	26441	26970	26354	27428	27646	27386	26192	26479	26737	26169	25204	24658	24212
Massachusetts	53025	51757	51707	51336	50060	47991	47428	46309	45757	45078	43418	42604	42876	42090	40036	39337	38366
Michigan	94096	92794	95113	94689	94734	94430	92701	89905	88537	88925	78341	74457	74065	71511	70616	73943	75631
Minnesota	47045	45942	45702	45467	44731	44611	44790	43757	44842	45221	44061	44448	44901	43775	42323	41756	41225
Mississippi	17392	17369	17476	18357	18729	18816	18498	18055	18221	18405	18196	18359	18951	18417	17721	16591	16252
Missouri	50022	50467	50330	51114	50785	51664	51392	50666	51101	51617	50782	50326	51073	50249	48487	47182	46438
Montana	8617	8478	8237	8426	8398	8485	8469	8643	8789	8802	8763	9093	9178	9362	9043	9056	9170
Nebraska	16000	15676	15558	15648	15780	16150	16163	16511	16506	17059	16013	16119	15101	16101	15897	15607	14789
Nevada	13551	13101	12764	12875	-999	12341	12531	12309	12660	12564	11672	11900	12276	12085	11551	11405	11233
New Hampshire	8622	8985	9060	9242	9276	9434	9429	9465	9865	10650	10379	10358	10271	10015	9908	9494	9688
New Jersey	53191	52124	51821	52143	51135	49624	48760	47133	46915	46488	44097	42020	41726	40524	39149	38332	37558
New Mexico	6938	6854	6815	6932	7132	7175	7315	7051	6904	6388	6757	6836	6848	6551	6403	5974	6017
New York	107713	105735	104302	102849	102085	102412	98763	96278	96934	95235	92632	90052	89031	86768	85139	83713	82210
North Carolina	58944	58387	59031	60674	60835	62640	62247	63005	61070	55179	59088	58102	59156	58769	56755	55004	53837
North Dakota	6383	6186	6059	6000	5396	5594	5630	5625	5958	6209	6122	6742	6909	7050	7124	6900	6845
Ohio	103126	94020	100570	101739	101620	102073	100017	97139	95635	95679	93322	93103	92363	90917	87914	84902	83091
Oklahoma	27069	26824	27576	27672	27753	28044	28051	27869	28438	28027	27419	27333	27881	27405	27104	26084	25199
Oregon	27407	26991	26526	26706	26276	25914	25650	25469	26072	25743	25475	25868	26729	26647	26052	26544	26210
Pennsylvania	91529	90093	87719	88664	91807	92801	91765	88670	89849	90304	87971	86842	85858	84761	82170	77352	77702
Rhode Island	7597	7574	7336	7203	6175	6373	6716	6479	6396	6693	6006	6042	6291	5935	5566	5670	5703
South Carolina	25386	25406	26323	27139	27785	27409	27587	27052	27406	27784	28024	28031	29042	28557	28902	27461	27648
South Dakota	7552	7551	9559	7542	7612	7829	7809	7736	7993	8198	8331	8447	8692	8692	8584	8382	8310
Tennessee	49904	48994	49116	50632	51755	52224	52559	50885	51147	51682	50558	51547	51345	49413	46776	46123	46153
Texas	113099	113823	114438	115507	117102	118929	117195	117017	116983	114326	112655	112164	113465	112611	111263	108800	106369
Utah	30344	30406	31655	32352	33585	34279	34780	36773	36727	37387	37352	38391	38940	38646	37007	36538	36425
Vermont	6306	6030	6061	5819	5946	5748	5855	5797	5798	5850	5818	5596	5795	5715	5294	5332	5329
Virginia	51436	50880	50004	50216	50307	50632	49677	48737	48653	50103	48440	48788	48622	47521	46093	44386	44194
Washington	48362	47396	47442	47733	47112	46580	45335	44098	43984	44100	44506	43920	44533	44538	44102	43076	43445
West Virginia	19791	19148	19167	19571	19535	19956	22645	19755	19431	19792	19377	19283	19799	19510	18801	18279	17980
Wisconsin	44749	44758	44785	45491	44709	45789	45386	44317	44654	44955	43453	42605	43638	42573	41300	39809	38870
Wyoming	5176	5121	5175	5196	5230	5345	5409	5673	5871	5845	5980	6324	6501	6300	6239	6024	5847

## Sheet: Blacks
State\Report Year	2000	2001	2002	2003	2004	2005	2006	2007	2008	2009	2010	2011	2012	2013	2014	2015	2016
Alabama	19706	19030	19430	19656	19546	20015	19778	18560	18061	18400	18391	18496	19319	19593	18863	18147	17815
Alaska	486	439	482	463	441	464	409	372	329	367	340	346	339	321	295	276	267
Arizona	3085	3331	3365	3747	3965	4246	4331	4673	4803	4817	4169	3930	3957	4020	4085	4072	4120
Arkansas	7904	8099	8170	8362	8250	8499	8392	8309	8098	7883	7679	7418	8436	8563	8196	7862	7656
California	33420	32133	32220	31509	30753	30166	30001	28243	27753	26472	25637	27466	26610	27368	27008	27923	27559
Colorado	2954	3008	2995	3205	3274	3505	3401	3417	3531	3434	2932	2950	2964	3111	3039	2883	2914
Connecticut	5618	5570	5610	5721	5884	5606	5650	5515	5465	5506	5115	4989	4996	4830	4756	4512	4554
Delaware	2338	2284	2431	2569	2674	2741	2842	2851	2952	3090	2955	2906	2999	3175	3075	2948	2795
District of Columbia	4357	4175	4411	3872	4269	4316	4073	3937	3849	3835	4170	4436	4763	4881	4887	4886	5053
Florida	43925	42904	44471	46883	47111	49246	46444	45357	43583	44333	44974	46504	48635	48747	47526	45422	45125
Georgia	41167	40267	41633	42862	43117	46058	46358	45179	44414	45166	45727	47225	49618	50348	49077	46607	45952
Hawaii	391	404	378	461	415	379	368	401	365	334	404	346	327	284	208	248	220
Idaho	-999	-999	183	187	201	213	262	238	225	238	192	162	195	215	165	177	214
Illinois	30268	31243	30776	29137	27106	26453	25806	24779	24774	24919	24234	24495	24949	24927	23995	23346	22070
Indiana	8008	7732	8167	8498	8623	8918	9101	8919	8806	9225	9075	9609	10120	10150	9816	9789	9505
Iowa	1579	1589	1722	1794	1909	2027	2130	2240	2320	2130	1955	2069	2208	2235	2215	2246	2299
Kansas	2866	2795	2776	2925	2797	2742	3025	3120	3098	2585	2683	2759	2710	2761	2712	2580	2426
Kentucky	4996	4791	4710	4825	5041	5159	5101	5012	4940	4974	5123	5231	5446	5356	5310	4958	4971
Louisiana	26963	25253	26731	27283	27462	23957	25095	24794	23991	24806	24416	25320	26196	25359	24525	23427	23148
Maine	206	252	285	280	293	332	356	413	411	471	261	414	463	429	444	451	471
Maryland	20168	20505	20775	20709	20346	20876	20277	21138	21385	21770	20692	21147	22073	22455	21848	21307	20883
Massachusetts	5863	5241	5489	5693	5770	5075	5194	4952	5093	5080	5270	5350	5693	5975	5950	5656	5957
Michigan	23357	22915	24391	24466	23977	24223	23067	21965	21734	22805	19419	18618	18267	18382	18321	20481	20493
Minnesota	4649	4724	4861	5337	5426	5737	5990	6113	6396	6673	5697	6031	6525	6672	6825	6838	7113
Mississippi	19260	18660	18438	18986	19651	20341	19615	19020	18501	18505	18480	20159	21358	20541	19659	17828	17229
Missouri	11057	10851	11273	11870	9836	12308	11777	11619	11461	12084	11355	11587	12017	11727	11262	10938	10758
Montana	81	104	95	107	117	108	140	116	135	165	107	118	95	80	67	68	81
Nebraska	1503	1447	1521	1564	1604	1731	1777	1730	1815	1859	1658	1688	1473	1653	1596	1532	1432
Nevada	2442	2509	2750	2768	-999	3151	3213	3196	3374	3383	3004	2944	3299	3567	3534	3670	3931
New Hampshire	129	149	168	172	223	245	228	251	265	272	241	229	204	212	200	186	232
New Jersey	15350	15045	15749	16086	16244	16065	15946	15117	15357	15228	14212	14079	15546	14632	14954	14381	13909
New Mexico	565	545	530	563	630	659	654	672	670	535	526	477	502	512	512	443	458
New York	34548	32743	33166	32709	33088	32930	31946	31554	30688	32644	33932	32687	33693	34189	33710	32599	31360
North Carolina	31561	32196	32332	33757	34455	35808	30431	30752	34577	30879	28242	29564	30571	32023	31590	29503	28814
North Dakota	93	126	135	119	101	147	149	182	226	196	189	239	266	285	356	385	400
Ohio	21207	19847	21339	22106	21567	21842	21281	20516	20443	20735	21202	22413	22651	22434	23123	21807	21495
Oklahoma	4915	4920	4969	5369	5243	5480	5336	5421	5443	5654	5083	4983	4921	4742	4906	4530	4386
Oregon	1159	1163	1222	1158	1272	1281	1112	1136	1136	1004	926	984	1012	1048	1024	1001	958
Pennsylvania	18708	18513	18462	18981	20090	20745	20457	18599	18437	18490	18895	18969	19371	19567	19260	17873	18733
Rhode Island	755	828	931	886	748	859	927	888	939	987	813	752	900	844	834	782	924
South Carolina	19875	18337	20128	20504	20774	21093	20566	19871	19528	19826	19127	19849	21006	20903	20565	18981	18412
South Dakota	137	133	158	175	186	171	207	189	289	309	280	287	326	305	310	323	351
Tennessee	17216	17097	17350	18384	18223	18463	18248	17487	17706	17330	16683	17505	17673	17504	16742	16260	16170
Texas	39709	39971	41804	42623	43837	47825	46731	47018	47452	44817	44780	45791	47234	46729	47254	45523	44995
Utah	389	348	415	436	505	543	615	739	611	643	625	543	589	627	631	640	615
Vermont	78	67	99	59	97	80	102	84	106	91	106	106	113	113	100	101	101
Virginia	22281	21753	21719	22864	22672	22745	21992	21925	21646	21783	21107	21671	21943	21710	21000	20125	19706
Washington	3988	3969	4149	4270	4226	4023	3702	3767	3718	4036	3326	3233	3507	3382	3446	3254	3523
West Virginia	954	908	1000	1094	1102	1128	1239	1155	1082	990	961	904	854	802	832	725	711
Wisconsin	5698	6021	6089	6549	6309	6300	6219	6108	6279	6391	5911	5985	6093	6126	6129	5586	5239
Wyoming	91	74	94	98	92	108	110	113	109	86	73	75	86	109	83	75	74

## Sheet: Hispanics
State\Report Year	2000	2001	2002	2003	2004	2005	2006	2007	2008	2009	2010	2011	2012	2013	2014	2015	2016
Alabama	1229	1329	1632	1886	2081	2540	2905	3099	3580	3639	4080	4041	4562	4657	4705	4747	4799
Alaska	371	434	402	419	470	470	418	607	575	526	608	675	698	732	734	700	745
Arizona	26552	29665	30305	32783	35217	36915	38983	39117	38190	36728	36946	38339	39751	40453	38518	36516	36139
Arkansas	1805	2139	2384	2670	2994	3365	3659	4089	4149	4315	4484	4668	4999	5002	5071	4895	4826
California	228251	230955	232418	233769	234383	237785	239946	236392	237134	252163	257228	270815	272485	283618	284098	293884	296319
Colorado	13323	14897	15653	17175	17804	18940	19129	19134	19662	19103	22154	22285	22778	23164	22663	21693	20982
Connecticut	6126	6409	6678	7141	7265	7354	7697	7708	8128	8248	8756	9155	9724	9676	9965	9744	9909
Delaware	679	749	773	888	978	1148	1173	1326	1490	1452	1654	1687	1742	1899	1856	1796	1945
District of Columbia	609	610	631	525	646	660	645	682	632	622	880	980	1116	1175	1153	1091	1090
Florida	37391	39675	43075	46481	49263	52414	52161	51961	51280	54594	58041	61621	64902	64784	63646	63169	65700
Georgia	8174	9444	10632	12092	13612	15357	17171	17692	17473	19588	20462	20639	21520	21610	21566	20972	20799
Hawaii	589	702	688	582	604	674	612	736	727	725	834	2793	3188	3363	2219	2854	2911
Idaho	-999	-999	2499	2799	2809	3008	3327	3294	3318	3556	3678	3932	4170	4369	3962	3895	4057
Illinois	28425	30119	30637	31650	32093	32946	33699	34056	35182	35028	37913	38409	38994	38044	36851	34843	34017
Indiana	3388	3794	4071	4670	4977	5572	6495	6370	6570	6983	8107	8657	9571	9761	9625	9246	9197
Iowa	1718	1937	2108	2284	2526	2912	2807	2992	3146	3807	3906	4223	4483	4521	4341	4247	4161
Kansas	3696	3846	4209	4681	4697	5035	5454	5436	5722	6794	7058	7296	7423	7805	7547	7300	7053
Kentucky	637	736	896	1056	1255	1400	1757	1923	2034	2247	2877	3388	3695	3790	3671	3538	3582
Louisiana	867	1029	1099	1099	1304	1337	1477	1735	1897	2117	1675	2851	3324	3687	3895	3936	3960
Maine	99	99	111	113	116	155	152	158	189	202	233	314	294	304	278	290	291
Maryland	3615	4063	4444	4511	4815	5518	5950	6975	7357	7796	9066	10032	11002	11154	11534	11322	11576
Massachusetts	8162	8004	8443	8791	8819	9728	10080	10861	11373	11785	12351	13387	13970	14188	14053	13616	14137
Michigan	5708	5635	6231	6704	6971	7461	7488	7351	7381	7345	7976	7739	8297	8316	8488	9240	9604
Minnesota	2839	3212	3723	3966	4046	4427	4823	4945	5153	5572	5594	5740	5805	6402	6222	6085	5664
Mississippi	408	531	559	604	745	800	1063	1108	1361	1271	1407	1507	1642	1657	1608	1404	1446
Missouri	1547	1726	2004	2342	2452	2798	3163	3321	3414	3487	4048	4215	4451	4378	4304	4276	4218
Montana	195	237	222	241	284	278	313	275	302	312	489	499	552	533	577	515	508
Nebraska	2036	2396	2650	2749	3000	3114	3270	3471	3551	3737	4153	4288	3848	4423	4552	4319	4144
Nevada	8481	9220	9588	10606	-999	11904	13247	13351	13367	13220	13772	14341	14775	14906	14450	14749	14798
New Hampshire	256	249	278	305	314	382	371	401	444	540	596	568	649	597	665	666	654
New Jersey	15260	15687	16787	17811	18405	19368	20103	20573	21635	23416	23934	24535	26946	25849	27094	27337	27687
New Mexico	12104	12307	12820	13592	14149	14604	14897	15190	15104	16192	16225	16262	16940	16930	16308	14982	14549
New York	38830	37983	37656	38606	38790	38376	40332	40296	41466	43407	47991	52323	55212	56411	56906	56547	54625
North Carolina	7187	8552	9649	11003	12407	14060	15964	16857	16823	14571	19286	20739	22085	21294	21831	21407	20690
North Dakota	89	110	131	118	543	171	175	204	209	236	1	285	330	367	413	446	453
Ohio	2593	2710	3188	3512	3745	4027	4183	4373	4423	4655	6671	6979	7539	7961	7820	7377	7555
Oklahoma	3253	3535	4152	4502	4973	5413	5964	6194	6568	6952	7844	8401	9133	9348	9669	9262	9124
Oregon	5520	5925	6381	7103	7008	7752	8042	8220	8310	9376	9898	10016	10265	10318	10047	9452	9690
Pennsylvania	6494	6821	7217	7878	9315	9749	10695	10346	10851	11790	12555	13610	13973	14405	14991	14561	15008
Rhode Island	1756	1895	1997	2118	1545	1979	2149	2042	2140	2074	2474	2564	2736	2816	2558	2476	2424
South Carolina	1380	1579	1955	2279	2581	2984	3456	3881	3952	4186	4746	5139	5348	5398	5342	5292	5512
South Dakota	134	128	178	218	220	229	245	286	326	368	535	562	701	649	687	713	707
Tennessee	1851	2322	2636	3060	3562	4393	5152	5418	5641	5931	6759	7485	8203	7964	7633	7789	8088
Texas	132805	139570	148694	154955	161970	171232	175981	179176	183036	195114	195325	199058	206187	207197	205682	195025	192573
Utah	3904	4311	4386	4874	5289	5791	6352	7789	7310	7160	7489	7345	8011	8056	8174	7936	7864
Vermont	38	84	44	41	55	60	60	66	60	80	84	85	114	102	89	98	87
Virginia	5304	5951	6468	6951	7562	8517	9317	9938	10091	10633	13184	14179	15123	15208	15074	14587	14884
Washington	9447	10025	10755	11170	11866	12155	12575	13016	13404	14234	16694	18314	19567	19906	19929	19336	19422
West Virginia	75	78	121	112	155	188	237	204	216	242	321	277	312	375	350	327	332
Wisconsin	3402	3847	4106	4618	4840	5254	5727	6017	6162	6352	6908	7380	7450	7558	7463	7242	7280
Wyoming	486	520	576	645	633	625	730	759	853	1044	1074	1039	989	1157	1140	1181	1104
