# Supplementary material for: Race/Ethnicity-Resolved Time Trends in United States ASD Prevalence Estimates from IDEA and ADDM
Source: J Autism Dev Disord. 2019 Aug 21;49(12):4721–30. doi: 10.1007/s10803-019-04188-6 (PMC6841650; doi:10.1007/s10803-019-04188-6)
Supplement: Supplementary file 4 — Supplementary material 4 (XLSX 27 kb) [file 10803_2019_4188_MOESM4_ESM.xlsx]

## Sheet: All Races ASD Prevalence
Survey Year	2000	2002	2004	2006	2008	2010	2012	2014
Birth Year	1992	1994	1996	1998	2000	2002	2004	2006
Arizona	6.5	6.2	9.8	12.1	15.6	15.7	15.2	14		prevalence in %
Arkansas	NaN	6.9	NaN	NaN	10.5	15.5	12	13.1
Colorado	NaN	5.9	NaN	7.5	11.8	9.9	10.8	13.9
Georgia	6.5	7.6	8.9	10.2	11.9	15.5	15.5	17
Maryland	5.5	6.7	8.8	9.2	12.4	16.6	18.2	20
Missouri	NaN	7.3	8.2	12.1	13.9	14.2	11.5	14.1
NewJersey	9.9	10.6	NaN	17.6	20.5	21.9	24.6	29.3
NorthCarolina	NaN	6.5	8.7	10.4	14.2	17.3	16.9	17.4
Wisconsin	NaN	5.2	7.8	7.6	7.8	9.3	10.8	14.1
%Use only 1 county health + education area in MD in 2004
%Use only 1 county health + education area in CO in 2000

## Sheet: White ASD Prevalence
Survey Year	2000	2002	2004	2006	2008	2010	2012	2014
Birth Year	1992	1994	1996	1998	2000	2002	2004	2006
Arizona	8.6	7.7	12.6	14.8	20.7	18.8	16.9	16.2		prevalence in %
Arkansas	NaN	7.4	NaN	NaN	13.5	17.6	12.8	13.9
Colorado	NaN	6.4	NaN	6.7	14.8	11.3	12.2	15
Georgia	7.9	8.9	9.7	12	11.8	18.2	17.6	17.9
Maryland	4.9	7	7.4	9.3	12.9	16.8	18.5	19.5
Missouri	NaN	7.7	8.7	13.7	14.6	13.7	12	14.1
New Jersey	11.3	12.5	NaN	21.1	21	22.7	26.6	30.2
North Carolina	NaN	6.4	8.6	12.2	14.6	18.9	18.9	18.6
Wisconsin	NaN	5.9	7.4	8.5	8.6	10.5	12	15.2
%Use only 1 county health + education area in MD in 2004
%Use only 1 county health + education area in CO in 2000

## Sheet: Black ASD Prevalence
SurveyYear	2000	2002	2004	2006	2008	2010	2012	2014
BirthYear	1992	1994	1996	1998	2000	2002	2004	2006
Arizona	7.3	6.3	5.6	12.9	16.1	16.3	19.4	19.5		prevalence in %
Arkansas	NaN	5.8	NaN	NaN	7.1	11	9.9	10.4
Colorado	NaN	6.4	NaN	12.5	10.5	9.2	10.5	11.4
Georgia	5.3	6.8	7.9	9.5	11.9	14	13.4	17.1
Maryland	6.1	6.2	12.8	7.9	11.7	15.5	18.6	16.5
Missouri	NaN	4.7	3.2	5.1	9.3	8.4	9	10.8
New Jersey	10.6	7.7	NaN	14.8	20.6	17.9	23.7	26.8
North Carolina	NaN	7.2	9	7.5	15.4	15.7	15.5	16.1
Wisconsin	NaN	3.7	3.6	3.6	5	4.6	5.8	11.3
%Use only 1 county health + education area in MD in 2004
%Use only 1 county health + education area in CO in 2000

## Sheet: Hispanic ASD Prevalence
SurveyYear	2000	2002	2004	2006	2008	2010	2012	2014
BirthYear	1992	1994	1996	1998	2000	2002	2004	2006
Arizona	NaN	3.4	7	8.3	8.9	10.6	11.3	10.3		prevalence in %
Arkansas	NaN	2.9	NaN	NaN	10.1	9.1	NaN	8.4
Colorado	NaN	2	NaN	4.5	6.7	6.1	6.5	10.6
Georgia	NaN	4.6	6.4	4.8	7.1	10.7	11.5	12.6
Maryland	NaN	1.4	8.8	6.3	5.9	9.8	12.2	15.7
Missouri	NaN	1.8	5.5	2.6	9	12.3	8.1	4.9
New Jersey	NaN	9.7	NaN	15.1	20	21.4	17.6	29.3
North Carolina	NaN	4.1	6.8	6.1	7.6	9.7	9.1	11.9
Wisconsin	NaN	0.3	1.6	1.7	3.8	5.6	7.4	12.5
%Use only 1 county health + education area in MD in 2004
%Use only 1 county health + education area in CO in 2000

## Sheet: All Races Total Survey Pop
Survey Year	2000	2002	2004	2006	2008	2010	2012	2014
Birth Year	1992	1994	1996	1998	2000	2002	2004	2006
Arizona	45322	45113	13620	41650	32601	33768	32615	24952
Arkansas	NaN	36472	NaN	NaN	4940	38956	14153	39992
Colorado	NaN	11020	NaN	7184	7725	38806	40538	41128
Georgia	43593	44299	45190	46621	50427	48529	49720	51161
Maryland	21532	29722	20981	26489	27022	27605	9577	9955
Missouri	NaN	28049	26970	26533	25668	25367	25870	25333
New Jersey	29714	29748	NaN	26309	7082	31723	32581	32935
North Carolina	NaN	20725	20187	22195	36913	37783	38913	30283
Wisconsin	NaN	35126	11312	34058	34451	35623	35556	35037
%Use only 1 county health + education area in MD in 2004
%Use only 1 county health + education area in CO in 2000

## Sheet: White Total Survey Pop
Survey Year	2000	2002	2004	2006	2008	2010	2012	2014
Birth Year	1992	1994	1996	1998	2000	2002	2004	2006
Arizona	24564	25252	6571	19664	15022	16239	15525	12308
Arkansas	NaN	25981	NaN	NaN	2371	26335	9083	26103
Colorado	NaN	7516	NaN	4009	3990	21598	22370	22410
Georgia	18094	18038	18270	17871	18725	15875	16451	15495
Maryland	11533	17100	15044	18464	18337	17713	5019	4977
Missouri	NaN	19043	18818	18199	17718	17058	17211	16529
New Jersey	11913	12670	NaN	11387	3096	13724	13829	13593
North Carolina	NaN	12134	11670	12727	21038	20376	20789	15241
Wisconsin	NaN	23893	9593	22361	22479	21898	21758	20732
%Use only 1 county health + education area in MD in 2004
%Use only 1 county health + education area in CO in 2000

## Sheet: Black Total Survey Pop
Survey Year	2000	2002	2004	2006	2008	2010	2012	2014
Birth Year	1992	1994	1996	1998	2000	2002	2004	2006
Arizona	2041	2377	713	2244	1804	1958	1856	1336
Arkansas	NaN	7771	NaN	NaN	2112	7516	3739	7705
Colorado	NaN	933	NaN	963	1051	2402	2469	2724
Georgia	19232	19824	19176	19877	20690	20772	20556	22042
Maryland	8507	10865	4213	5601	5796	6209	3171	3399
Missouri	NaN	7817	6651	6702	6153	6436	6516	6577
New Jersey	7860	8020	NaN	6569	1601	7336	7100	7166
North Carolina	NaN	6284	5798	6160	9414	9604	9544	7701
Wisconsin	NaN	6564	554	6157	5818	6460	6342	6486
%Use only 1 county health + education area in MD in 2004
%Use only 1 county health + education area in CO in 2000

## Sheet: Hispanic Total Survey Pop
Survey Year	2000	2002	2004	2006	2008	2010	2012	2014
Birth Year	1992	1994	1996	1998	2000	2002	2004	2006
Arizona	NaN	15348	5576	17577	14227	13739	13180	9792
Arkansas	NaN	2074	NaN	NaN	296	4087	1025	5012
Colorado	NaN	2026	NaN	1761	2233	12697	13448	13735
Georgia	NaN	4342	5167	6015	7875	8601	9019	9913
Maryland	NaN	735	685	1109	1347	1842	656	829
Missouri	NaN	548	728	777	891	973	1109	1220
New Jersey	NaN	7407	NaN	6876	2050	8937	9787	10226
North Carolina	NaN	1707	2070	2618	4977	5968	6517	5463
Wisconsin	NaN	3419	634	4153	4720	5721	5915	6181
%Use only 1 county health + education area in MD in 2004
%Use only 1 county health + education area in CO in 2000
